# Supplementary material for: Relationship between the High Fatty Liver Index and Risk of Fracture
Source: PubMed Central journal article supplement — Gut Liver. 2022 Jul 27;17(1):119–29. doi: 10.5009/gnl210571 (PMC9840917; doi:10.5009/gnl210571), 2022-07-27
Supplement: gnl-17-1-119-supple.pdf [file gnl-17-1-119-supple.pdf]

**Supplementary Table 1.** Variance Inflation Factor in Models

| Model 1*          |       | Model 2†                      |       |
|-------------------|-------|-------------------------------|-------|
| Variable          | VIF   | Variable                      | VIF   |
| Age               | 1.019 | Age                           | 1.652 |
| Sex               | 1.147 | Sex                           | 2.033 |
| Fatty liver index | 1.135 | Smoking                       | 1.908 |
|                   |       | Alcohol consumption           | 1.288 |
|                   |       | Activity, MET-min/wk          | 1.029 |
|                   |       | SBP, mm Hg                    | 2.494 |
|                   |       | DBP, mm Hg                    | 2.333 |
|                   |       | log(FBG), mg/dL               | 1.263 |
|                   |       | log(total cholesterol), mg/dL | 2.608 |
|                   |       | log(LDL-cholesterol), mg/dL   | 2.451 |
|                   |       | log(AST), IU/L                | 2.467 |
|                   |       | log(ALT), IU/L                | 3.003 |
|                   |       | Diabetes mellitus             | 1.317 |
|                   |       | Dyslipidemia                  | 1.112 |
|                   |       | Hypertension                  | 1.592 |
|                   |       | Coronary artery disease       | 1.134 |
|                   |       | Arrhythmia                    | 1.076 |
|                   |       | Valvular heart disease        | 1.044 |
|                   |       | Peripheral arterial disease   | 1.123 |
|                   |       | Cardiovascular disease        | 1.123 |
|                   |       | Osteoporosis                  | 1.248 |
|                   |       | Use of steroid                | 1.015 |
|                   |       | Use of vitamin D              | 1.058 |
|                   |       | Fatty liver index             | 1.800 |

VIF, variance inflation factor; MET, metabolic equivalent of task; SBP, systemic blood pressure; DBP, diastolic blood pressure; FBG, fasting blood glucose; LDL, low-density lipoprotein; AST, aspartate aminotransferase; ALT, alanine aminotransferase.

\*Cox proportional hazard model including age and sex as covariates;

†Cox proportional hazard model including age, sex, smoking status, alcohol consumption, activity, SBP, DBP, diabetes mellitus, dyslipidemia, hypertension, coronary artery disease, arrhythmia, valvular heart disease, peripheral arterial disease, cerebrovascular disease, osteoporosis, use of steroids, and use of vitamin D supplements as covariates, and log-transformed FBG, total cholesterol, LDL cholesterol, ALT activity, and AST activity as covariates.

**Supplementary Table 2.** Relationship between Fatty Liver Index and Incident Fracture According to Bedogni *et al.*<sup>27</sup>

| Fatty liver index | No.     | Incident fracture<br>No. (%) | Univariate          |         | Model 1 <sup>†</sup> |         | Model 2 <sup>†</sup> |         |
|-------------------|---------|------------------------------|---------------------|---------|----------------------|---------|----------------------|---------|
|                   |         |                              | HR [95% CI]         | p-value | HR [95% CI]          | p-value | HR [95% CI]          | p-value |
| 0 to <30          | 124,186 | 1,493 (1.2)                  | Reference           |         | Reference            |         | Reference            |         |
| 30 to <60         | 35,857  | 782 (2.2)                    | 1.770 (1.624–1.930) | <0.001  | 1.487 (1.361–1.625)  | <0.001  | 1.189 (1.081–1.308)  | <0.001  |
| ≥60               | 20,476  | 445 (2.2)                    | 1.819 (1.636–2.022) | <0.001  | 1.947 (1.744–2.173)  | <0.001  | 1.342 (1.180–1.527)  | <0.001  |
| Continuous        | 180,519 | 2,720 (1.5)                  | 1.012 (1.010–1.013) | <0.001  | 1.012 (1.010–1.013)  | <0.001  | 1.005 (1.003–1.007)  | <0.001  |

HR, hazard ratio; CI, confidence interval.

\*Cox proportional hazard model including age and sex as covariates; <sup>†</sup>Cox proportional hazard model including age, sex, smoking status, alcohol consumption, activity, systolic blood pressure, diastolic blood pressure, fasting blood glucose, total cholesterol, alanine aminotransferase activity, aspartate aminotransferase activity, diabetes mellitus, dyslipidemia, hypertension, coronary artery disease, arrhythmia, valvular heart disease, peripheral arterial disease, cerebrovascular disease, osteoporosis, use of steroids, and use of vitamin D supplements as covariates.

**Supplementary Table 3.** Relationship between FLI and Incident Fracture According to Yang *et al.*<sup>31</sup>

| FLI*                     | No.     | Incident fracture<br>No. (%) | Univariate          |         | Model 1 <sup>†</sup> |         | Model 2 <sup>‡</sup> |         |
|--------------------------|---------|------------------------------|---------------------|---------|----------------------|---------|----------------------|---------|
|                          |         |                              | HR (95% CI)         | p-value | HR (95% CI)          | p-value | HR (95% CI)          | p-value |
| Low probability          | 98,099  | 975 (1.0)                    | Reference           |         | Reference            |         | Reference            |         |
| Intermediate probability | 25,994  | 454 (1.7)                    | 1.727 (1.545–1.930) | <0.001  | 1.129 (1.009–1.263)  | 0.034   | 0.968 (0.875–1.099)  | 0.575   |
| High probability         | 56,426  | 1,291 (2.3)                  | 2.285 (2.103–2.483) | <0.001  | 1.607 (1.479–1.747)  | <0.001  | 1.161 (1.053–1.281)  | 0.003   |
| Continuous               | 180,519 | 2,720 (1.5)                  | 1.012 (1.010–1.013) | <0.001  | 1.012 (1.010–1.013)  | <0.001  | 1.005 (1.003–1.007)  | <0.001  |

FLI, fatty liver index; HR, hazard ratio; CI, confidence interval.

\*FLI: (1) Low probability: male FLI, 0 to <25 and female FLI, 0 to <10; (2) Intermediate probability: male FLI, 25 to <35 and female FLI, 10 to <20 (3) High probability: male FLI,  $\geq 35$  and female FLI,  $\geq 20$ ; <sup>†</sup>Cox proportional hazard model including age and sex as covariates; <sup>‡</sup>Cox proportional hazard model including age, sex, smoking status, alcohol consumption, activity, systolic blood pressure, diastolic blood pressure, fasting blood glucose, total cholesterol, alanine aminotransferase activity, aspartate aminotransferase activity, diabetes mellitus, dyslipidemia, hypertension, coronary artery disease, arrhythmia, valvular heart disease, peripheral arterial disease, cerebrovascular disease, osteoporosis, use of steroids, and use of vitamin D supplements as covariates.
